# Supplementary material for: Rapid automated total arsenic and arsenic speciation by inductively coupled plasma mass spectrometry
Source: Royal Society of Chemistry journal article supplement (doi:10.1039/d2ja00055e), 2022-01-01
Supplement: d2ja00055e1.pdf [file d2ja00055e1.pdf]

## Supplementary Information

# Rapid Automated Total Arsenic and Arsenic Speciation by Inductively Coupled Plasma Mass Spectrometry

---

C. Derrick Quarles, Jr.\*, Patrick Sullivan, Nick Bohlim, Nathan Saetveit

Elemental Scientific, Inc., 7277 World Communications Dr., Omaha, NE, USA

\*Corresponding author email: [derrick.quarles@icpms.com](mailto:derrick.quarles@icpms.com)

**Table S1.** Comparison of results from the total arsenic measurements to reference values. Reference values provided by NYDOH (UE) and CTQ (QM and PC). n = 3.

| <b>Proficiency Testing Sample ID</b> | <b>Reference Value (<math>\mu\text{g L}^{-1}</math> As)</b> | <b>Measured Value (<math>\mu\text{g L}^{-1}</math> As)</b> |
|--------------------------------------|-------------------------------------------------------------|------------------------------------------------------------|
| UE19-10                              | 188 $\pm$ 38                                                | 207 $\pm$ 13                                               |
| UE19-11                              | 3.7 $\pm$ 6                                                 | 4.0 $\pm$ 0.2                                              |
| UE20-06                              | 61 $\pm$ 12                                                 | 57 $\pm$ 1                                                 |
| UE20-08                              | 21 $\pm$ 6                                                  | 20 $\pm$ 1                                                 |
| UE20-10                              | 101 $\pm$ 20                                                | 109 $\pm$ 7                                                |
| QM-U-Q2004                           | 93.3 $\pm$ 1.1                                              | 89.0 $\pm$ 0.8                                             |
| QM-U-Q2005                           | 49.9 $\pm$ 0.5                                              | 51.4 $\pm$ 3.8                                             |
| QM-U-Q2006                           | 32.4 $\pm$ 0.4                                              | 32.8 $\pm$ 2.1                                             |
| QM-U-Q2013                           | 42.3 $\pm$ 0.5                                              | 44.1 $\pm$ 2.4                                             |
| QM-U-Q2014                           | 378 $\pm$ 4                                                 | 362 $\pm$ 14                                               |
| QM-U-Q2015                           | 86 $\pm$ 1                                                  | 85 $\pm$ 4                                                 |
| PC-U-S1907                           | 128 $\pm$ 20                                                | 131 $\pm$ 7                                                |
| PC-U-S1908                           | 172 $\pm$ 27                                                | 173 $\pm$ 6                                                |
| PC-U-S1912                           | 631 $\pm$ 95                                                | 633 $\pm$ 18                                               |
| PC-U-S1913                           | 26.2 $\pm$ 5.6                                              | 26.5 $\pm$ 1.6                                             |
| PC-U-S2008                           | 378 $\pm$ 52                                                | 375 $\pm$ 9                                                |

**Table S2.** Comparison of results from the one-column arsenic speciation measurements to reference values. Reference values provided by NYDOH (UE) and CTQ (QM and PC). n = 3.

|               | Total As Target<br>(Ref. Range) | iAs Target<br>(Ref. Range) | One-Column Method ( $\mu\text{g L}^{-1}$ As) |               |               |               |               |             | Sum  | iAs  |
|---------------|---------------------------------|----------------------------|----------------------------------------------|---------------|---------------|---------------|---------------|-------------|------|------|
|               |                                 |                            | As III                                       | DMA           | AsC           | MMA           | As V          | AsB         |      |      |
| PC-U-S1907    | 128<br>(108-148)                | 2.44<br>(0.475-4.41)       | 0.909 ± 0.036                                | 1.84 ± 0.19   | 0             | 0             | 0.395 ± 0.042 | 129 ± 4     | 132  | 1.30 |
| PC-U-S1908    | 172<br>(145-199)                | 153<br>(122-184)           | 0                                            | 1.69 ± 0.11   | 0             | 0.471 ± 0.011 | 149 ± 12      | 10.4 ± 1.1  | 162  | 149  |
| PC-U-S1912    | 631<br>(535-726)                | 2.08<br>(0.123-4.03)       | 2.45 ± 0.21                                  | 2.01 ± 0.11   | 0             | 0             | 0             | 647 ± 22    | 651  | 2.45 |
| PC-U-S1913    | 26.2<br>(20.6-31.8)             | 23.9<br>(17.5-30.3)        | 18.3 ± 1.0                                   | 4.28 ± 0.04   | 0             | 0             | 1.70 ± 0.15   | 0           | 24.3 | 20.0 |
| PC-U-S2008    | 378<br>(326-430)                | 2.73<br>(1.08-4.38)        | 0.635 ± 0.011                                | 4.80 ± 0.02   | 0             | 0.172 ± 0.005 | 1.69 ± 0.08   | 366 ± 28    | 373  | 2.33 |
| QM-U-Q2004    | 93.3<br>(92.2-94.4)             | 80.4                       | 72.0 ± 3.5                                   | 3.04 ± 0.11   | 0             | 0             | 6.17 ± 0.49   | 6.84 ± 0.11 | 88.0 | 78.2 |
| QM-U-Q2005    | 49.9<br>(49.4-50.4)             | 40.2                       | 0                                            | 1.72 ± 0.08   | 0             | 2.64 ± 0.23   | 40.9 ± 1.7    | 3.02 ± 0.16 | 48.3 | 40.9 |
| QM-U-Q2006    | 32.4<br>(32.0-32.8)             | 28.7                       | 27.8 ± 2.2                                   | 1.73 ± 0.06   | 0             | 0             | 1.98 ± 0.24   | 1.67 ± 0.01 | 33.2 | 29.8 |
| QM-U-Q2013    | 42.3<br>(41.8-42.8)             | 6.12                       | 6.90 ± 0.11                                  | 20.1 ± 0.9    | 0             | 4.44 ± 0.24   | 2.56 ± 0.19   | 6.15 ± 0.09 | 40.2 | 9.46 |
| QM-U-Q2014    | 378<br>(374-382)                | 0                          | 0                                            | 2.18 ± 0.11   | 0             | 0             | 0             | 383 ± 22    | 385  | 0    |
| QM-U-Q2015    | 86.0<br>(85.0-87.0)             | 0                          | 0                                            | 74.1 ± 2.8    | 0             | 0             | 0             | 8.89 ± 0.38 | 83.0 | 0    |
| UE19-10       | 188<br>(150-226)                | -                          | 120 ± 4                                      | 1.76 ± 0.18   | 0.373 ± 0.050 | 0             | 60.5 ± 2.4    | 7.39 ± 0.16 | 190  | 181  |
| UE19-11       | 3.70<br>(0.0-9.7)               | -                          | 1.45 ± 0.05                                  | 0.560 ± 0.020 | 1.71 ± 0.02   | 0             | 1.33 ± 0.18   | 3.10 ± 0.08 | 8.15 | 2.78 |
| UE20-06       | 61.0<br>(49-73)                 | -                          | 21.9 ± 1.6                                   | 9.22 ± 0.45   | 7.72 ± 0.15   | 3.95 ± 0.10   | 7.84 ± 0.42   | 26.1 ± 1.9  | 76.7 | 29.7 |
| UE20-08       | 21.0<br>(15-27)                 | -                          | 19.8 ± 0.2                                   | 0.538 ± 0.036 | 2.26 ± 0.09   | 0             | 2.06 ± 0.09   | 2.71 ± 0.03 | 27.4 | 21.9 |
| UE20-10       | 101<br>(81-121)                 | -                          | 54.9 ± 3.1                                   | 10.7 ± 0.5    | 6.52 ± 0.23   | 0             | 16.5 ± 0.3    | 24.5 ± 1.5  | 113  | 71.4 |
| Urine Spike 1 | 60                              | 20                         | 10.5 ± 0.4                                   | 9.78 ± 0.43   | 10.4 ± 0.4    | 10.5 ± 0.6    | 9.23 ± 0.75   | 9.54 ± 0.34 | 60.0 | 19.7 |
| Urine Spike 2 | 60                              | 20                         | 10.2 ± 0.4                                   | 9.3 ± 0.5     | 10.7 ± 0.4    | 9.67 ± 0.41   | 10.7 ± 0.6    | 10.2 ± 0.6  | 60.8 | 20.9 |

**Table S3.** One and two-column arsenic speciation method results compared to the CTQ QM reference values. Samples are sorted by arsenic species. n = 3.

|            | Target Value ( $\mu\text{g L}^{-1}$ ) | One-Column Method Measured Value ( $\mu\text{g L}^{-1}$ ) | Two-Column Method Measured Value ( $\mu\text{g L}^{-1}$ ) |
|------------|---------------------------------------|-----------------------------------------------------------|-----------------------------------------------------------|
|            | <b>As III</b>                         | <b>As III</b>                                             | <b>As III</b>                                             |
| QM-U-Q2004 | 77.3 $\pm$ 6.7                        | 72.0 $\pm$ 3.5                                            | 82.7 $\pm$ 4.9                                            |
| QM-U-Q2006 | 26.8 $\pm$ 2.2                        | 27.8 $\pm$ 2.2                                            | 27.8 $\pm$ 2.4                                            |
| QM-U-Q2013 | 6.12 $\pm$ 0.06                       | 6.90 $\pm$ 0.11                                           | 5.37 $\pm$ 0.25                                           |
|            | <b>As V</b>                           | <b>As V</b>                                               | <b>As V</b>                                               |
| QM-U-Q2004 | 3.1 $\pm$ 0.2                         | 6.17 $\pm$ 0.49                                           | 5.15 $\pm$ 0.61                                           |
| QM-U-Q2005 | 40.2 $\pm$ 1.8                        | 40.9 $\pm$ 1.7                                            | 46.1 $\pm$ 6.0                                            |
| QM-U-Q2006 | 1.92 $\pm$ 0.73                       | 1.98 $\pm$ 0.24                                           | 1.89 $\pm$ 0.21                                           |
| QM-U-Q2013 | -                                     | 2.56 $\pm$ 0.19                                           | 2.91 $\pm$ 0.31                                           |
|            | <b>AsB</b>                            | <b>AsB</b>                                                | <b>AsB</b>                                                |
| QM-U-Q2004 | 6.65 $\pm$ 0.25                       | 6.84 $\pm$ 0.11                                           | 6.87 $\pm$ 0.52                                           |
| QM-U-Q2005 | 3.05 $\pm$ 0.28                       | 3.02 $\pm$ 0.16                                           | 3.20 $\pm$ 0.19                                           |
| QM-U-Q2006 | 1.24 $\pm$ 0.38                       | 1.67 $\pm$ 0.01                                           | 1.49 $\pm$ 0.08                                           |
| QM-U-Q2013 | 5.66 $\pm$ 0.12                       | 6.15 $\pm$ 0.09                                           | 5.71 $\pm$ 0.34                                           |
| QM-U-Q2014 | 378 $\pm$ 24                          | 383 $\pm$ 22                                              | 374 $\pm$ 21                                              |
| QM-U-Q2015 | 8.68 $\pm$ 0.68                       | 8.89 $\pm$ 0.38                                           | 9.88 $\pm$ 0.74                                           |
|            | <b>DMA</b>                            | <b>DMA</b>                                                | <b>DMA</b>                                                |
| QM-U-Q2004 | 1.9 $\pm$ 0.1                         | 3.04 $\pm$ 0.11                                           | 2.39 $\pm$ 0.19                                           |
| QM-U-Q2005 | 1.79 $\pm$ 0.19                       | 1.72 $\pm$ 0.08                                           | 1.78 $\pm$ 0.07                                           |
| QM-U-Q2006 | 1.8 $\pm$ 0.1                         | 1.73 $\pm$ 0.06                                           | 1.89 $\pm$ 0.03                                           |
| QM-U-Q2013 | 22.5 $\pm$ 0.3                        | 20.1 $\pm$ 0.9                                            | 22.0 $\pm$ 2.9                                            |
| QM-U-Q2014 | 3.85 $\pm$ 1.4                        | 2.18 $\pm$ 0.11                                           | 2.95 $\pm$ 0.21                                           |
| QM-U-Q2015 | 72.1 $\pm$ 3.2                        | 74.1 $\pm$ 2.8                                            | 73.5 $\pm$ 5.1                                            |
|            | <b>MMA</b>                            | <b>MMA</b>                                                | <b>MMA</b>                                                |
| QM-U-Q2005 | -                                     | 2.64 $\pm$ 0.23                                           | 1.17 $\pm$ 0.09                                           |
| QM-U-Q2013 | 3.89 $\pm$ 0.12                       | 4.44 $\pm$ 0.24                                           | 3.8 $\pm$ 0.4                                             |

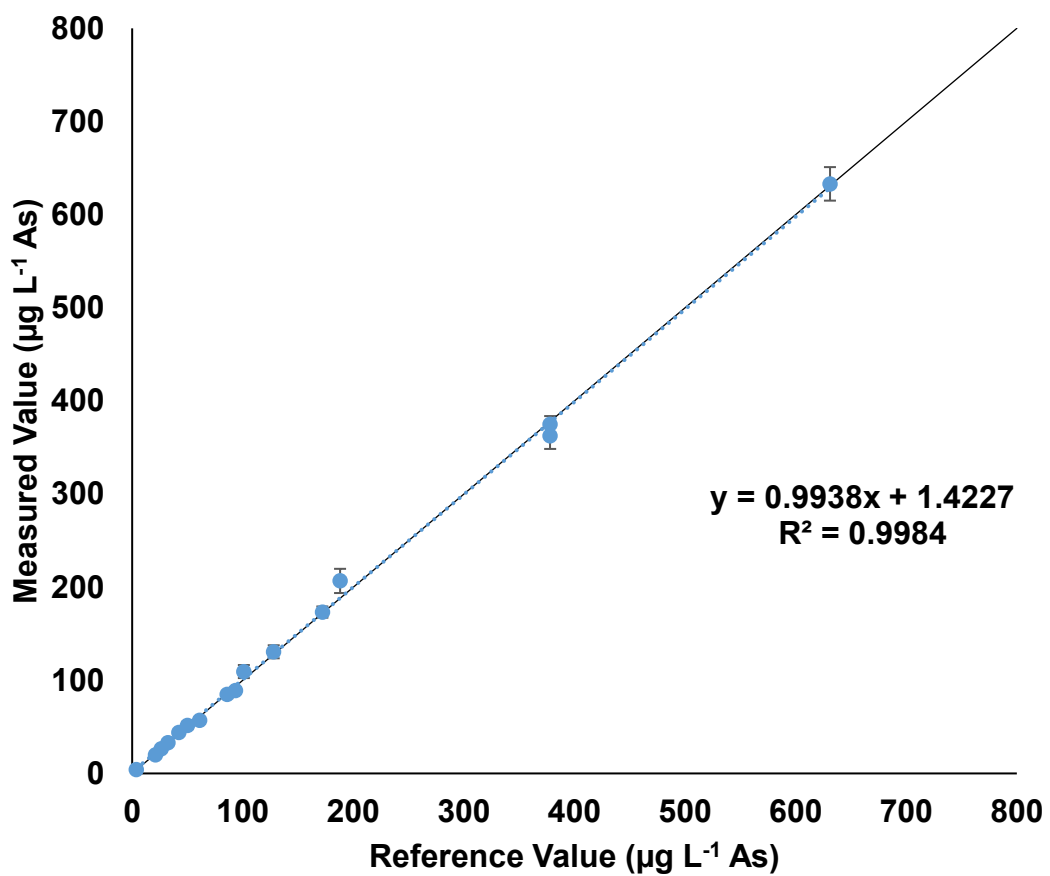

**Figure S1.** Linear regressions comparing the measured values for the total arsenic measurements to the target values (n=3).

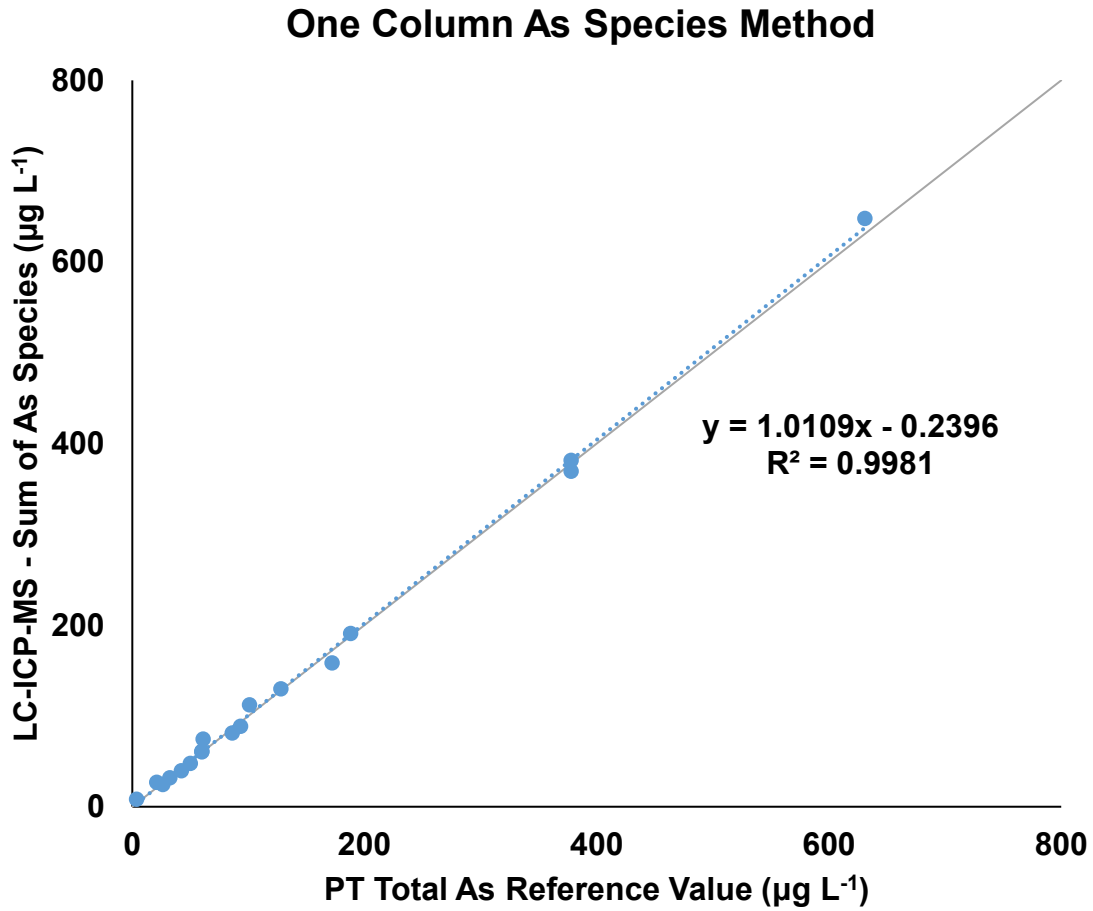

**Figure S2.** Linear regressions comparing the measured values from the one-column method to the target values for the sum of the arsenic species.

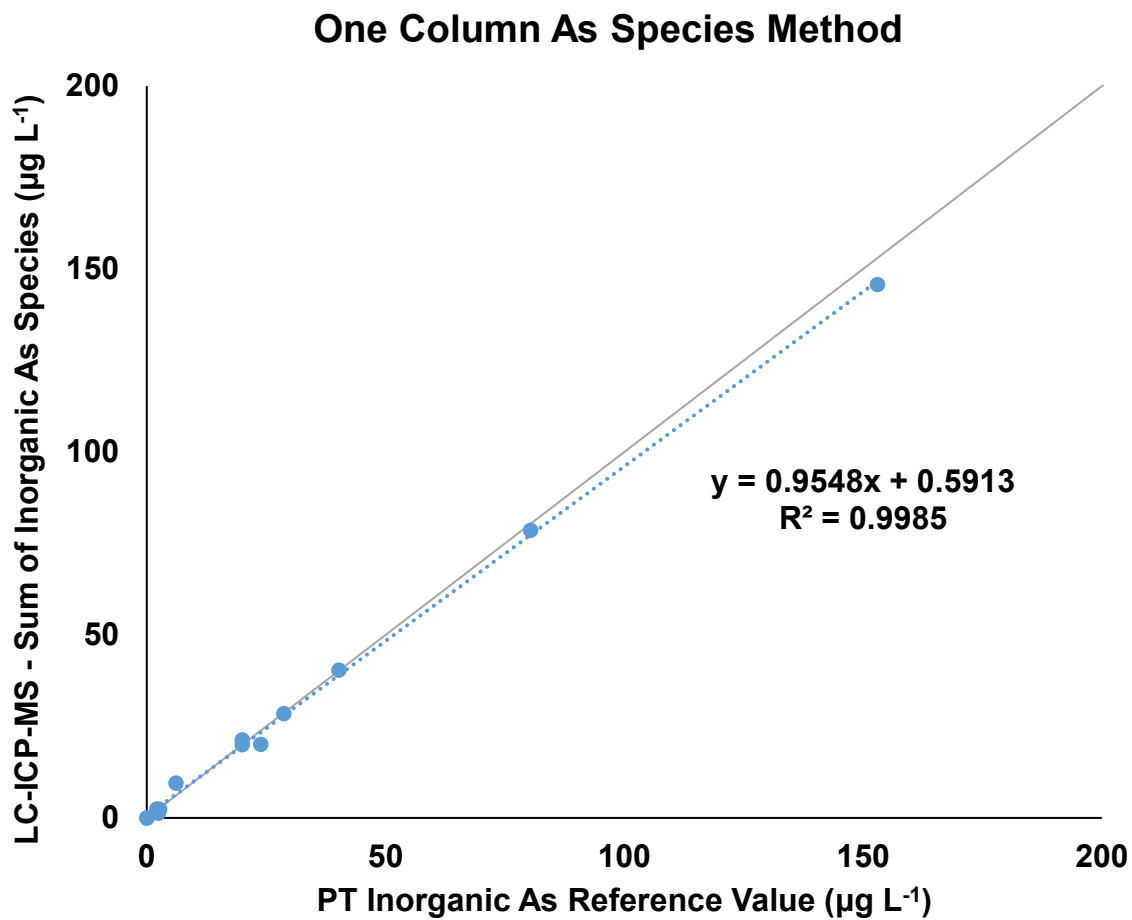

**Figure S3.** Linear regressions comparing the measured values from the one-column method to the target values for the inorganic arsenic species.

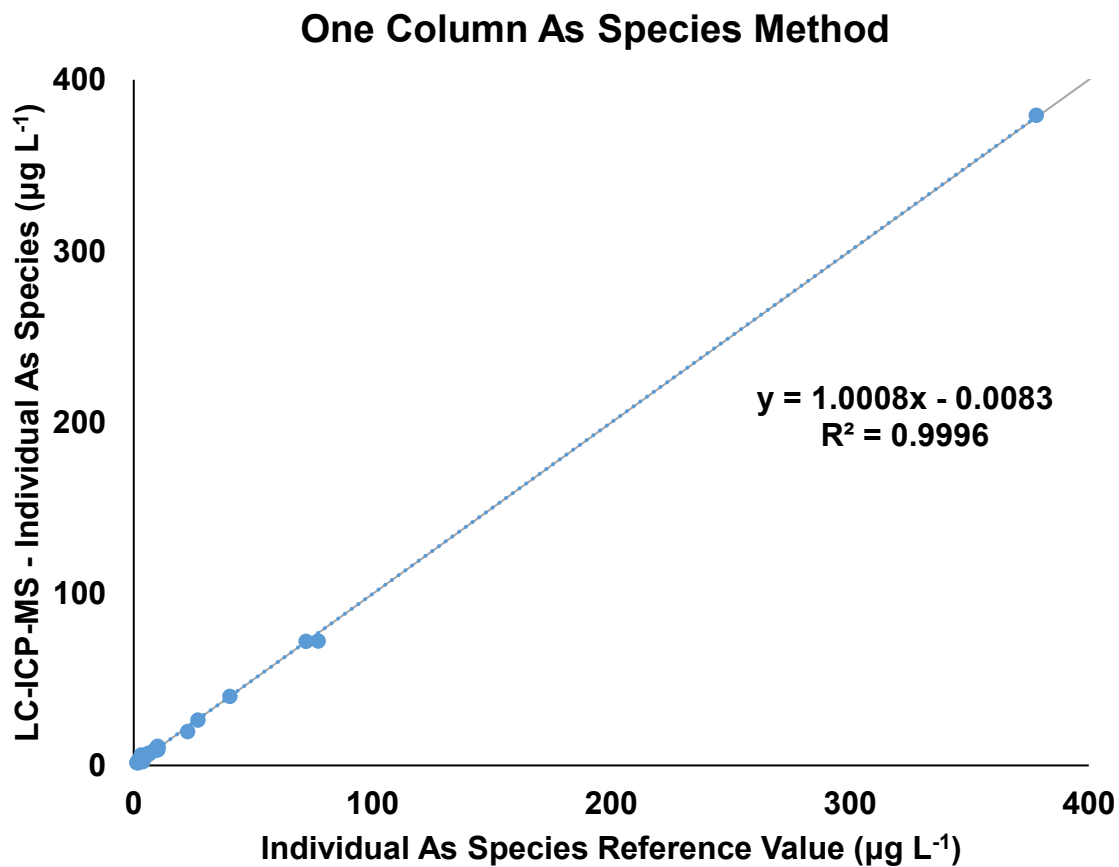

**Figure S4.** Linear regressions comparing the measured values from the one-column method to the target values for the individual arsenic species.



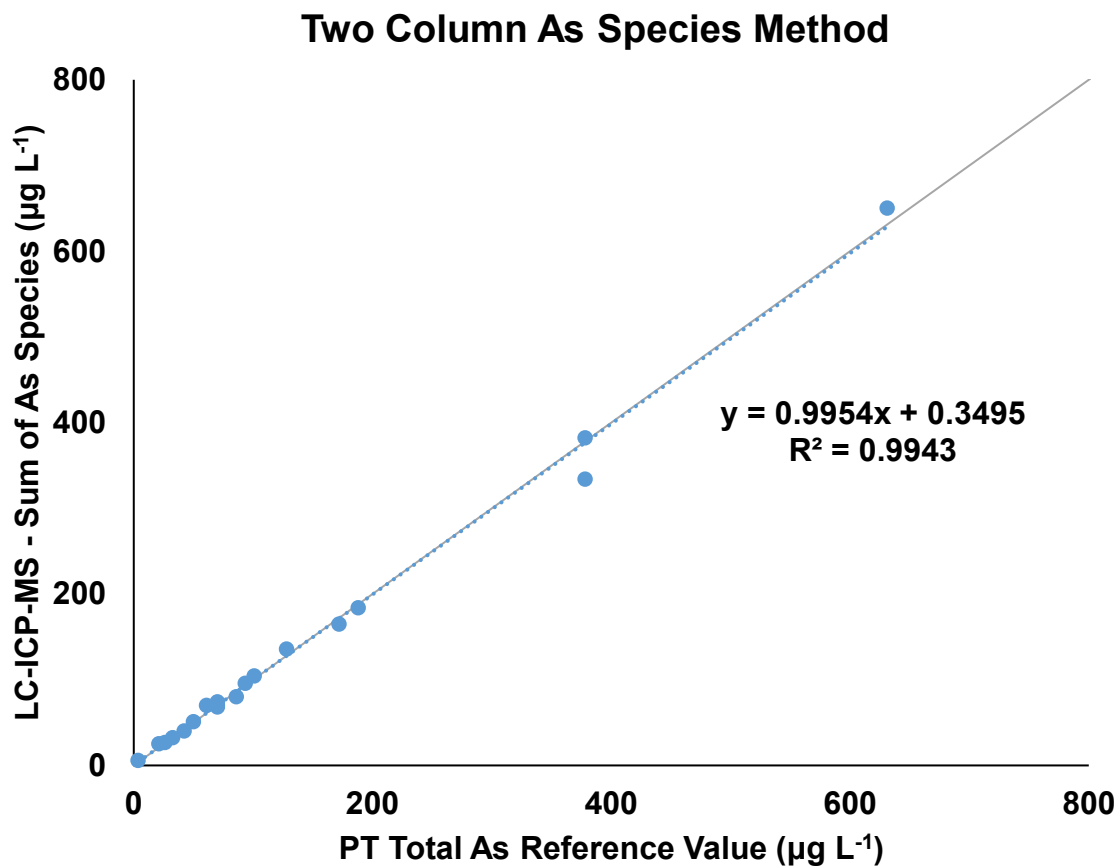

**Figure S5.** Linear regressions comparing the measured values from the two-column method to the target values for the sum of the arsenic species.

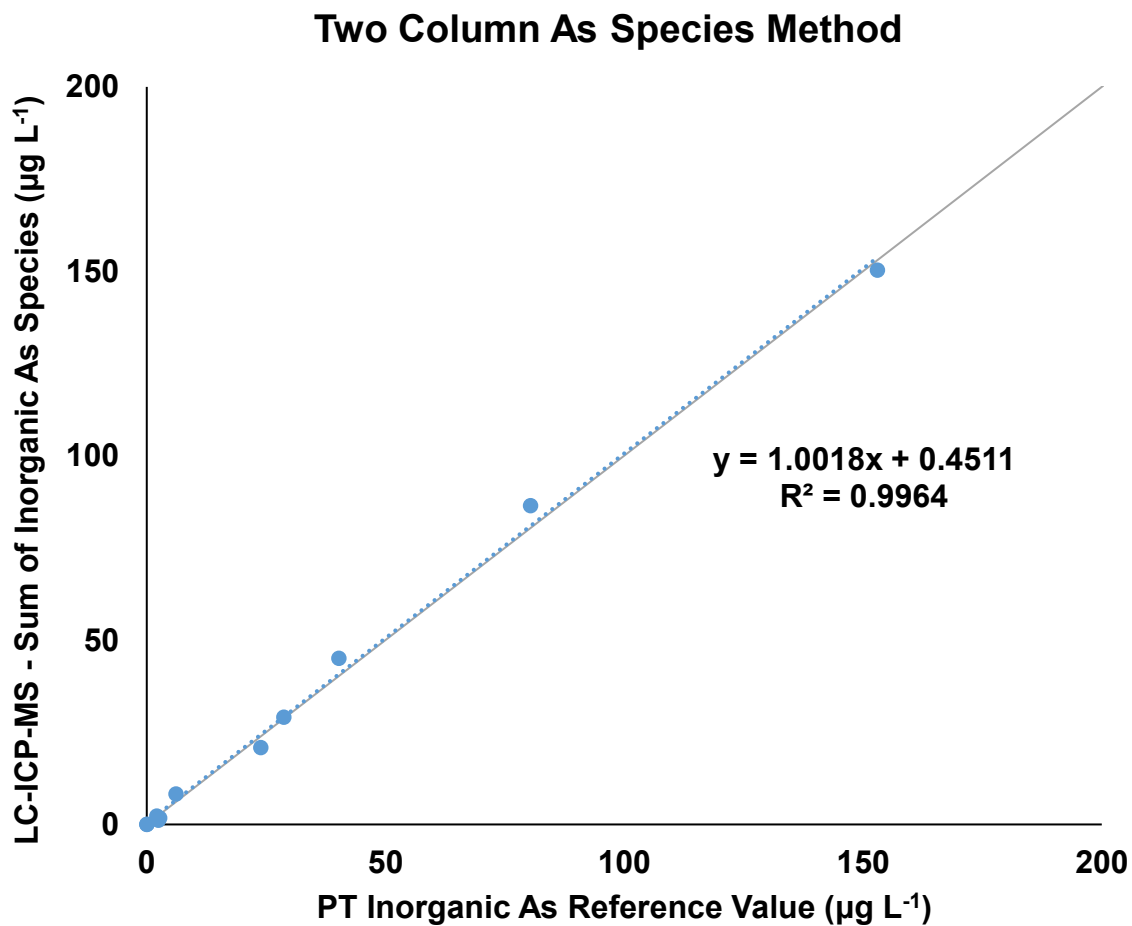

**Figure S6.** Linear regressions comparing the measured values from the two-column method to the target values for the inorganic arsenic species.

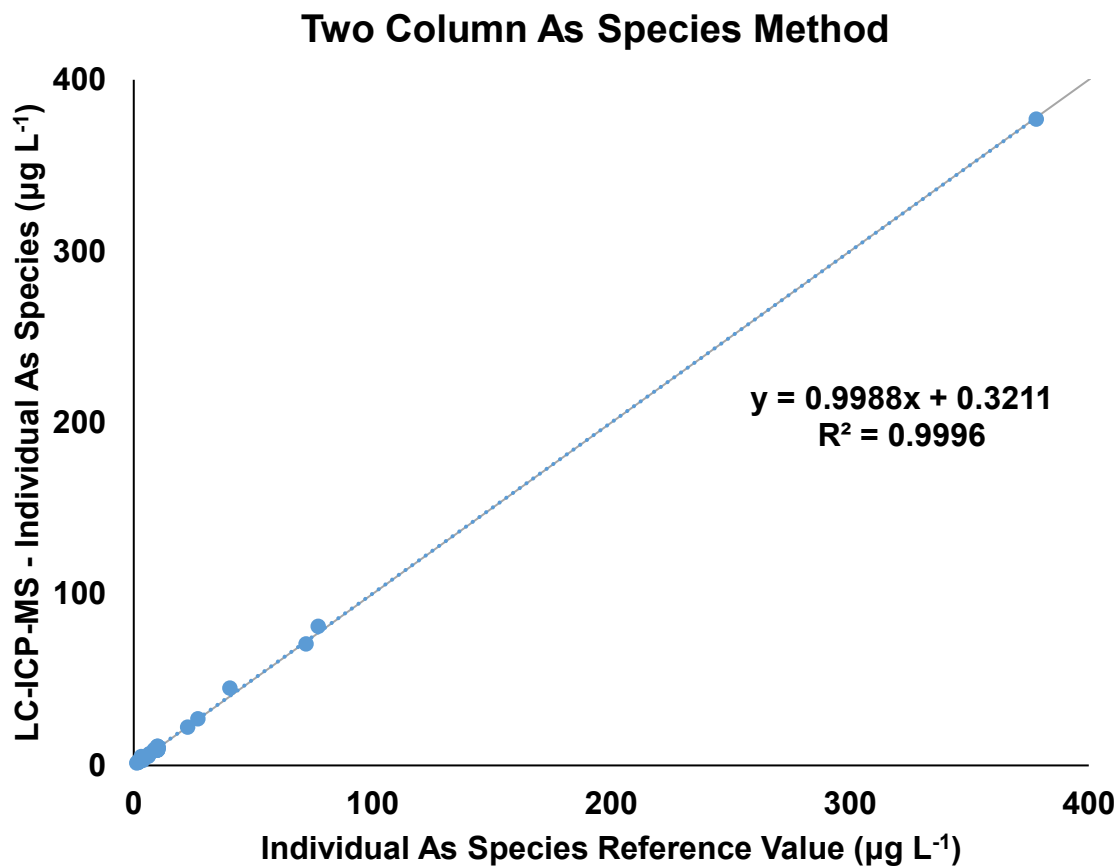

**Figure S7.** Linear regressions comparing the measured values from the two-column method to the target values for the individual arsenic species.
